# Supplementary material for: Conversions between metal–ligand multiple bond (MLMB) types: carbonyl olefination and other applications
Source: Royal Society of Chemistry journal article supplement (doi:10.1039/c0dt00825g), 2011-01-01
Supplement: c0dt00825g.pdf [file c0dt00825g.pdf]

Supplementary Information for:

## Conversions Between Metal-Ligand Multiple Bond (MLMB) Types and Their Applications

Aaron L. Odom\*

### *Summary of CSD search*

The CSD was searched for each of the metals of interest with bonds to N, C, and O atoms that are classified as having either 2 or 3 bonds. Initial data Table 1 is with the raw files from the CSD up to the May 5, 2020 update. This did not eliminate duplicate entries. Table 2 give the data from the November, 2009 data base where duplicates are removed based on the R values of duplicated entries.<sup>1</sup>

1. J. van de Streek, *Acta Cryst.* (2006) B62, 567-579.  
<http://dx.doi.org/10.1107/S0108768106019677>

Table1. CSD hits for Multiply Bonded M-N, -C, or -O atom structures. Duplicates remain. All updates up to May, 2010 included.

| Metal | C   | N   | O    | Total |
|-------|-----|-----|------|-------|
| Ti    | 42  | 323 | 53   | 418   |
| V     | 28  | 200 | 2982 | 3210  |
| Cr    | 366 | 98  | 264  | 728   |
| Mn    | 148 | 53  | 25   | 226   |
| Fe    | 213 | 42  | 13   | 268   |
| Co    | 30  | 12  | 3    | 45    |
| Zr    | 12  | 48  | 7    | 67    |
| Nb    | 28  | 145 | 170  | 343   |
| Mo    | 316 | 783 | 4229 | 5328  |
| Tc    | 3   | 128 | 213  | 344   |
| Ru    | 726 | 49  | 33   | 808   |
| Rh    | 73  | 1   | 1    | 75    |
| Hf    | 3   | 13  | 1    | 17    |
| Ta    | 92  | 201 | 20   | 313   |
| W     | 779 | 583 | 1772 | 3134  |
| Re    | 171 | 462 | 1740 | 2373  |
| Os    | 208 | 188 | 175  | 571   |
| Ir    | 99  | 10  | 2    | 111   |

Table 2. CSD hits for Multiply Bonded M-N, -C, or -O atom structures. Duplicates removed. Only November 2090 database used.

| Metal | C   | N   | O    | Total |
|-------|-----|-----|------|-------|
| Ti    | 20  | 209 | 30   | 259   |
| V     | 12  | 140 | 1593 | 1745  |
| Cr    | 293 | 67  | 152  | 512   |
| Mn    | 103 | 34  | 11   | 148   |
| Fe    | 144 | 22  | 1    | 167   |
| Co    | 22  | 9   | 0    | 31    |
| Zr    | 8   | 26  | 3    | 37    |
| Nb    | 14  | 105 | 79   | 198   |
| Mo    | 192 | 452 | 2289 | 2933  |
| Tc    | 2   | 76  | 151  | 229   |
| Ru    | 402 | 33  | 16   | 451   |
| Rh    | 45  | 0   | 0    | 45    |
| Hf    | 2   | 8   | 1    | 11    |
| Ta    | 58  | 132 | 13   | 203   |
| W     | 560 | 373 | 752  | 1685  |
| Re    | 111 | 350 | 1151 | 1612  |
| Os    | 115 | 119 | 117  | 351   |
| Ir    | 64  | 6   | 1    | 71    |

In these lists, a structure was counted for each unique MLMB in the compound. In other words, a compound with multiple oxo ligands was counted once. If one compound has both an oxo and an imido it would be counted once in each category.
